# Supplementary material
Source: PubMed Central journal article supplement (PMC7166110)
Supplement: mmc3.pdf [file mmc3.pdf]

# INDIVIDUAL CONFLICT OF INTEREST STATEMENT

## *American Association of Hip and Knee Surgeons*

(Adopted from the American Academy of Orthopaedic Surgeons disclosure statement)

The following form **must be filled out completely and submitted by each author (example, 6 authors, 6 forms).**  
**All items require a response. If there is no relevant disclosure for a given item, enter "None."**

**Manuscript Title:** *The Past, Present, and Future of Orthopaedic Education: Lessons Learned from the COVID-19 Pandemic*

1. Royalties from a company or supplier (The following conflicts were disclosed)  
**OrthoGrid**
2. Speakers bureau/paid presentations for a company or supplier (The following conflicts were disclosed)  
**None**
- 3A. Paid employee for a company or supplier (The following conflicts were disclosed)  
**None**
- 3B. Paid consultant for a company or supplier (The following conflicts were disclosed)  
**Stryker, OrthoGrid, Smith & Nephew, DJO, ConvaTec**
- 3C. Unpaid consultants for a company or supplier (The following conflicts were disclosed)  
**None**
4. Stock or stock options in a company or supplier (The following conflicts were disclosed)  
**OrthoGrid, Connexions**
5. Research support from a company or supplier as a Principal Investigator (The following conflicts were disclosed)  
**Zimmer/Biomet, Stryker**
6. Other financial or material support from a company or supplier (The following conflicts were disclosed)  
**None**
7. Royalties, financial or material support from publishers (The following conflicts were disclosed)  
**None**
8. Medical/Orthopaedic publications editorial/governing board (The following conflicts were disclosed)  
**Editorial Board Journal of Arthroplasty**
9. Board member/committee appointments for a society (The following conflicts were disclosed)  
American Association of Hip & Knee Surgeons (AAHKS), Education Committee  
American Association of Hip & Knee Surgeons (AAHKS), Program Committee  
American Academy of Orthopaedic Surgeons (AAOS), Orthopaedic Video Theater Committee

**Each author must sign AND print or type his/her name, date and submit a separate form**

In addition, one BLINDED Conflict of Interest form (no author names used) should be submitted per manuscript with all author disclosures.

Jeremy M. Gililland

Author Name (Print or Type)



Author Signature

4/11/2020

Date
